# Supplementary material
Source: PubMed Central journal article supplement (PMC4129472)
Supplement: mmc2.pdf [file mmc2.pdf]

## Article

## A Method to Predict Blood-Brain Barrier Permeability of Drug-Like Compounds Using Molecular Dynamics Simulations

Timothy S. Carpenter, Daniel A. Kirshner, Edmond Y. Lau, Sergio E. Wong, Jerome P. Nilmeier, and Felice C. Lightstone\*

Biosciences and Biotechnology Division, Physical and Life Sciences Directorate, Lawrence Livermore National Laboratory, Livermore, California

**ABSTRACT** The blood-brain barrier (BBB) is formed by specialized tight junctions between endothelial cells that line brain capillaries to create a highly selective barrier between the brain and the rest of the body. A major problem to overcome in drug design is the ability of the compound in question to cross the BBB. Neuroactive drugs are required to cross the BBB to function. Conversely, drugs that target other parts of the body ideally should not cross the BBB to avoid possible psychotropic side effects. Thus, the task of predicting the BBB permeability of new compounds is of great importance. Two gold-standard experimental measures of BBB permeability are logBB (the concentration of drug in the brain divided by concentration in the blood) and logPS (permeability surface-area product). Both methods are time-consuming and expensive, and although logPS is considered the more informative measure, it is lower throughput and more resource intensive. With continual increases in computer power and improvements in molecular simulations, *in silico* methods may provide viable alternatives. Computational predictions of these two parameters for a sample of 12 small molecule compounds were performed. The potential of mean force for each compound through a 1,2-dioleoyl-*sn*-glycero-3-phosphocholine bilayer is determined by molecular dynamics simulations. This system setup is often used as a simple BBB mimetic. Additionally, one-dimensional position-dependent diffusion coefficients are calculated from the molecular dynamics trajectories. The diffusion coefficient is combined with the free energy landscape to calculate the effective permeability ( $P_{\text{eff}}$ ) for each sample compound. The relative values of these permeabilities are compared to experimentally determined logBB and logPS values. Our computational predictions correlate remarkably well with both logBB ( $R^2 = 0.94$ ) and logPS ( $R^2 = 0.90$ ). Thus, we have demonstrated that this approach may have the potential to provide reliable, quantitatively predictive BBB permeability, using a relatively quick, inexpensive method.

### INTRODUCTION

Most drugs need to pass through at least one cellular membrane to reach their intended target. Although tight binding of a drug molecule to its intended target is important for potency, poor membrane permeability will likely result in a lack of efficacy *in vivo*. Thus, a detailed understanding of the partitioning of the solute in the membrane is vitally important for pharmacokinetics and rational drug design. Two possible transport modes are available for a molecule to pass through a membrane: active and passive (1). Active transport involves a transport protein that uses energy, e.g., ATP hydrolysis, to shuttle a molecule across a membrane. Passive transport, however, is the most common mode of drug passage through membranes and involves diffusion with no outside assistance or energy consumption. The rate of passive diffusion across a membrane is proportional to the partition coefficient of the compound between the membrane and the external medium, the diffusion coefficient of the compound through the membrane, and the compound's concentration gradient across the membrane (2). Important chemical properties of small molecules for the

process of membrane binding and diffusion are lipophilicity, molecular weight, and measures of molecular polarity (3).

Drugs that specifically target the central nervous system (CNS) must first pass the blood-brain barrier (BBB). Consisting of endothelial cells that form the brain capillaries (4), the BBB restricts the penetration of molecules, because of tight junctions formed by lateral transmembrane proteins, lack of fenestrations, the negative surface polarity, and the high level of efflux transporters, especially P-glycoprotein (P-gp) (5). The tight junctions significantly reduce permeation of ions and other small hydrophilic solutes through the intercellular cleft (paracellular pathway), thus forming the physical barrier. Essential molecular fluxes must use predominantly transcellular pathways. Passive diffusion of small compounds is assumed to be the most important permeability process through the BBB, although active transport of compounds may be more significant than originally thought (6). Although the BBB is protective in nature, the inability for drug molecules to permeate the BBB is a significant impediment for CNS drug candidates and should be addressed early in the drug discovery process (7). Additionally, drugs targeting peripheral organs need to be investigated for BBB permeability to avoid possible CNS side effects.

Submitted December 31, 2013, and accepted for publication June 16, 2014.

\*Correspondence: [lightstone1@llnl.gov](mailto:lightstone1@llnl.gov)

Editor: Bert de Groot.

© 2014 by the Biophysical Society  
0006-3495/14/08/0630/12 \$2.00

<http://dx.doi.org/10.1016/j.bpj.2014.06.024>

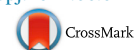

Based upon the large assumption that a compound's activity is equivalent to its BBB permeability, compounds are often classified by the terms CNS+ or CNS-. (8–10) CNS+ refers to compounds that show a desired in vivo effect in the CNS, whereas CNS- refers to compounds that do not show an expected in vivo CNS effect. However, this descriptor is phenotypic and does not properly describe those compounds that have low BBB permeability but high potency. Thus, this descriptor can be misleading.

Perhaps the most common parameter used to quantify penetration of a compound across the BBB is the ratio of the concentration of compound measured in the brain to the concentration of compound measured in the blood at steady state. This ratio is expressed as logBB ( $\log[\text{brain}]/[\text{blood}]$ ) and determines the total extent of brain exposure, at a steady state.

A less commonly used descriptor of BBB permeability is the determination of the permeability surface-area product (expressed as logPS). LogPS is perhaps a more appropriate in vivo measurement when considering BBB penetration (11,12) and is more informative than logBB. The logPS measurement is most often performed following the perfusion method that was implemented by Takasato et al. (13). In doing this, the method eliminates the effect of serum binding of the compound in question and provides a direct measure of BBB apparent permeability. However, because of the need for microsurgical expertise, the logPS measurement is resource intensive and relatively low throughput. As a result, significantly less literature data are available. PS can be calculated using the Renkin-Crone (14,15) equation:

$$PS = -F \ln \left( 1 - \frac{K_{in}}{F} \right), \quad (1)$$

where PS (the permeability surface-area product) is measured in (ml/min/g brain),  $F$  is the cerebral blood or perfusion flow rate (ml/min/g brain), and  $K_{in}$  is the unidirectional transfer constant.  $K_{in}$  is equal to  $(Q_{br}/C_{pf})/T$ , where  $Q_{br}$  is the concentration of compound in the brain (corrected for the vascular volume),  $C_{pf}$  is the concentration of compound in the perfusion fluid, and  $T$  is the perfusion time. Note, logBB measures concentrations at equilibrium, whereas logPS is more a measurement of the initial permeability rate. As such, logPS is the pharmacokinetic uptake clearance across the BBB into the brain.

Because of the labor-intensive, expensive, low-throughput, and technically challenging process of obtaining detailed in vivo BBB permeability data, several well-characterized in vitro and in silico permeability prediction methods have been developed. These methods are faster, cheaper, easier to carry out, and are important in the early stages of the drug discovery process.

Two of the most common and relatively simple in vitro BBB permeability prediction methods are the parallel artificial membrane permeability assay (PAMPA) and the immobilized artificial membrane (IAM) technique. The PAMPA

in vitro technique was developed in 1998 by Kansy, et al. (16). It was originally developed to rapidly predict passive permeability through the gastrointestinal tract, but has since been adapted for use in BBB studies by Di, et al. (17). PAMPA-BBB has shown good prediction of BBB penetration for CNS classes of drugs (17–22). The technique involves a donor compartment and an acceptor compartment separated by a filter supporting a liquid artificial membrane. The artificial membrane can be composed of a variety of phospholipid mixtures. The compound to be tested is placed in the donor compartment and is allowed to permeate between the donor and the acceptor compartments through the artificial membrane. As the assay can be performed in 96-well plates, high throughput screening is possible. IAMs mimic the phospholipid environment of the BBB by anchoring synthetic lipid analogs to silica particles in monolayer density. These particles are then used as the packing material for a high-performance liquid chromatography column (23–26). The IAM chromatographic retention factors are used to generate predictions of membrane permeability. These systems have shown reasonable results for prediction of permeability, despite the retention time in the column not reflecting actual passage across the membrane (27,28).

An alternate approach is to employ computational methods to compute logBB. Most in silico prediction approaches use quantitative structure-activity relationship (QSAR) models (29–33). In QSAR studies, the biological activity is treated as an outcome of the various interactions that a compound experiences during transport through BBB (whether this be passive or active). These interactions are assumed to be governed by the chemical structure and properties of the compound, also known as descriptors. As such a mathematical model of the biological activity is optimized based on a combination of a variety of descriptors for the small molecule compound. Thus, a change in structure can result in a change in biological response, which in this case is permeability through the BBB.

One of the most powerful (though computer intensive) in silico techniques is molecular dynamics (MD), which allows the simulation of molecular processes, such as diffusion, at the atomic level (34). Coupling MD with free energy techniques provides a powerful tool to study membrane permeability in detail (35). Human membranes are a complicated mixture of small molecules, various lipids, and proteins, but with a judicious choice of lipid a single bilayer may provide similar physicochemical properties to a cellular membrane. Indeed, phosphatidylcholine lipids are the major phospholipid within cellular membranes (36). Previous studies have investigated the permeation of small molecules (such as water and ethanol) and a limited number of drug molecules through homogenous lipid bilayers (37–42). Although these MD simulations could not replicate the same absolute permeability values seen experimentally, they were able to reproduce the relative permeabilities of these compounds.

In this study, we use free-energy simulations to investigate the permeability of 12 diverse small molecule compounds (Fig. 1) through a simple BBB mimic. We compare the computed effective permeabilities ( $P_{\text{eff}}$ ) of these compounds to experimentally measured values of logBB and logPS and find this approach to be reliable and predictive of compound permeability through the BBB.

## METHODS

For this study, the following small molecule compounds were chosen: alprazolam, atenolol, chlorpromazine, cimetidine, ibuprofen, imipramine, mannitol, nordazepam, promazine, salbutamol, salicylate, and theophylline (Fig. 1). The sample set was selected based upon several criteria, such as their size, charge, general ability to cross the BBB via a passive diffusion mechanism, and most are compounds that have been used in previous BBB permeability studies. Of importance, they cover a wide range of logBB values from  $-1.5$  to  $-2.5$  as evenly distributed as possible (Table 1, see Fig. 3 A). Of the 12 compounds, six are identified in the literature (43–46) to cross the BBB, and six are identified to not cross the BBB (Table 1).

## MD setup

All simulations were run using GROMACS 4.5.5 (47). The Berger, et al. force field was used for the 1,2-dioleoyl-*sn*-glycero-3-phosphocholine (DOPC) molecules (48), the gromos53a6 force field was used for the small compounds (49), and the SPC model was used to represent the water (50). Each simulation contained a single copy of the compound harmonically restrained at specified locations along the  $z$  axis in the solvated DOPC bilayer system. The complete system contained 5124 water molecules, 72 DOPC molecules, and one small compound. A typical system contained

a total of  $\sim 19,300$  atoms. The system was energy minimized using a combination of steepest descents and conjugate gradients.

The energy-minimized system was used for MD simulations. Simulations were performed at 323 K (well above the gel-liquid phase transition temperature) using the Nosé-Hoover thermostat (51) with  $\tau_T = 0.5$  ps. The pressure was maintained at 1 bar using a semi-isotropic Parrinello-Rahman barostat (52) with  $\tau_P = 1$  ps and a compressibility of  $4.5 \times 10^{-5} \text{ bar}^{-1}$ . Bond lengths were constrained using the LINCS algorithm (53), allowing a 2 fs time step to be used. Nonbonded interactions were truncated at 1.4 nm, and the neighbor list updated every 10 ps. The long-range electrostatic interactions were calculated using the particle mesh Ewald method (54,55).

The topologies for the small molecule compounds were generated using the Automated Topology Builder server [http://compbio.chemistry.uq.edu.au/atb/] (56). The topology-building server combines a knowledge-based approach with quantum mechanical calculations to produce parameters that are compatible with the desired force field. Initially, the molecule is optimized at the HF/STO-3G level of theory, and then reoptimized at the B3LYP/6-31G\* level of theory (57–59) in implicit water. The charges are initially estimated by fitting the electrostatic potential using a Kollman-Singh scheme (60). The Hessian matrix is then calculated and used to estimate force constants for bonds and angles. All compounds were modeled in their neutral forms and physiologically relevant charged states. All parameters are freely available from the Automated Topology Builder server.

## Free-energy calculations

Umbrella sampling was used to calculate the potential of mean force (PMF) free-energy profiles for the partitioning of compounds. A single harmonic restraint with a force constant of  $1000 \text{ kJ mol}^{-1} \text{ nm}^{-2}$  was applied to the distance between the center of mass of the DOPC bilayer and the center of mass of the compound, in the direction of the  $z$  axis (the normal to the bilayer). One hundred different umbrella sampling simulations were performed in increments of 0.1 nm along the  $z$  axis direction. The center of

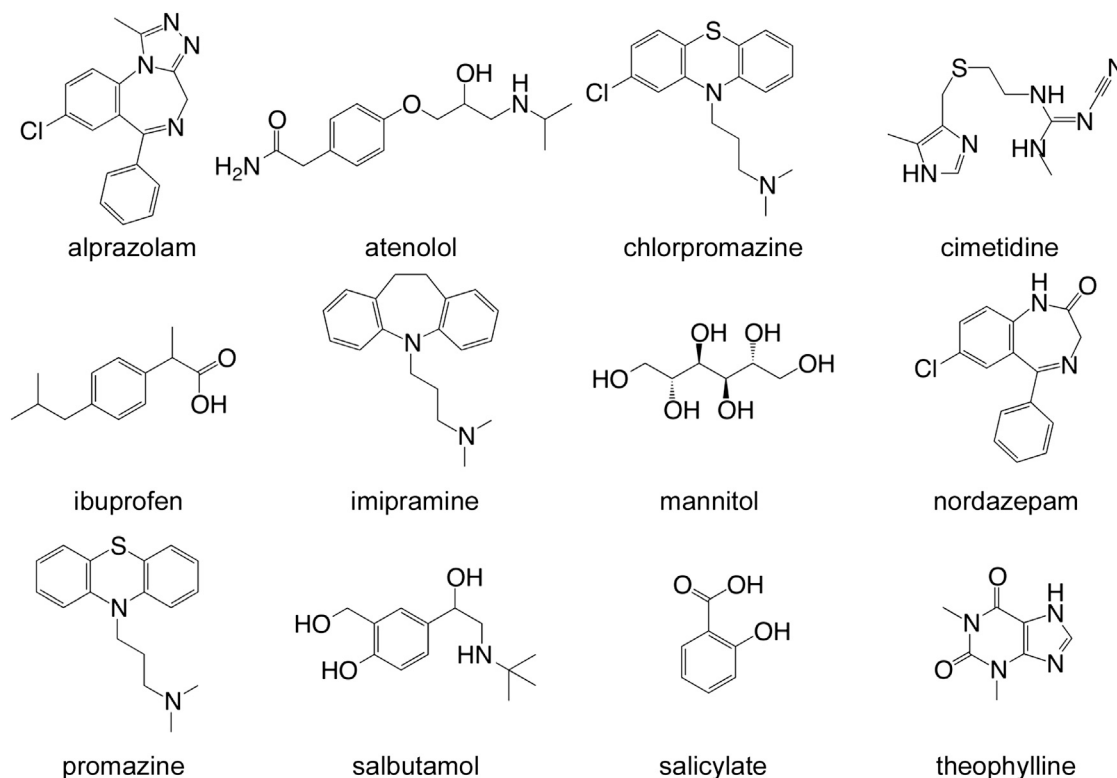

FIGURE 1 Molecular structure of the 12 small compounds studied.

**TABLE 1** List of molecules investigated and their BBB permeability parameters

| Compound       | logBB | logPS        | Calculated logP <sub>eff</sub> | BBB+/- | <sup>a</sup> Predicted BBB+/- | <sup>b</sup> Predicted logBB | References |
|----------------|-------|--------------|--------------------------------|--------|-------------------------------|------------------------------|------------|
| Mannitol       | -2.51 | -4.30        | -6.62                          | -      | -                             | -2.30                        | (46,70,71) |
| Cimetidine     | -1.42 | -3.93        | -3.94                          | -      | -                             | -1.34                        | (20,43,72) |
| Salicylate     | -1.10 | -3.40        | -5.17                          | -      | -                             | -1.78                        | (29,45,73) |
| Salbutamol     | -1.03 | <sup>c</sup> | -1.95                          | -      | -                             | -1.31                        | (43,74)    |
| Atenolol       | -0.87 | <sup>c</sup> | -1.77                          | -      | -                             | -0.57                        | (43,75)    |
| Theophylline   | -0.29 | -2.80        | -0.94                          | -      | -                             | -0.27                        | (44,71,73) |
| Ibuprofen      | -0.18 | -1.58        | -0.63                          | +      | -                             | -0.16                        | (45,75,76) |
| Alprazolam     | 0.02  | <sup>c</sup> | 0.67                           | +      | +                             | 0.30                         | (43,75)    |
| Nordazepam     | 0.50  | -1.00        | 2.04                           | +      | +                             | 0.79                         | (43,77,78) |
| Imipramine     | 0.83  | -1.43        | 2.13                           | +      | +                             | 0.82                         | (43,79,80) |
| Chlorpromazine | 1.06  | -1.20        | 2.68                           | +      | +                             | 1.02                         | (43,73,81) |
| Promazine      | 1.23  | <sup>c</sup> | 2.78                           | +      | +                             | 1.05                         | (43,82)    |

<sup>a</sup>Predicted BBB+ if logP<sub>eff</sub> ≥ 0, predicted BBB- if logP<sub>eff</sub> < 0.

<sup>b</sup>Using Eq. 7.

<sup>c</sup>No data available.

the bilayer was treated as  $z = 0$ , thus the windows spanned  $z = -5$  nm to  $z = 5$  nm. The 10 nm distance completely covers the traversal of the compound from bulk water, through the entire membrane, and out into bulk water again. This set of simulations was carried out for each of the compounds of interest, as well as ethanol (a threonine side-chain analog), which was used as a control for comparison to previously published data (41).

Each simulation window was initially run for ~45 ns, for a total of ~100  $\mu$ s of simulation time for the 20 different drug compounds charged state combinations and one control simulation. The initial ~20 ns of each simulation was regarded as extensive equilibration time to allow the compound to correctly orient within the system. This equilibration time was tested to see if the PMF curves for each compound had converged (Fig. S1 in the Supporting Material). If needed, simulations were extended or the number of umbrella sampling windows were increased to achieve convergence. All subsequent analyses were carried out only on the final 25 ns of each simulation. The weighted histogram analysis method (61), as implemented within GROMACS, was used to calculate the PMF for each compound based upon the data from the umbrella sampling distributions. The PMF curves are averaged as the distance of the compound from the center of the bilayer (where  $z = 0$ ) because the lipid bilayer can be treated as symmetrical. All free-energy profiles are normalized to zero in bulk water.

## Diffusion and permeability

Membrane permeability of a small molecule can be calculated by combining information from the PMF 1D energy landscape with diffusion coefficients within the membrane. These diffusion rates may vary with position within the membrane.

The position-specific diffusion coefficients were calculated from the MD simulation data using the method of Hummer (62). For each position-restrained simulation, the positions of the compound were sampled at 2 ps intervals, and the variance and autocovariance—at lags from one interval up to 500 intervals—were calculated using 500 points for each variance or covariance calculation. The resulting autocovariance curve decays roughly exponentially with increasing lag time—though experimental noise causes the curve to fluctuate around zero rather than decaying fully to zero with increasing lag. A least-squares fit to the log of the autocovariance data was made to estimate the characteristic time,  $\tau$ , of the autocovariance decay. The long-run fluctuations around zero were not included in this estimate—points on the curve after it first decays within the standard deviation of the long-run fluctuations were discarded. The diffusion coefficient was calculated as

$$D(Z) = \frac{\text{var}(Z)}{\tau_Z}, \quad (2)$$

where  $\langle Z \rangle$  is the average of the reaction coordinate  $Z$  in the biased run, and  $\text{var}(z)$  is the variance of the compound position (the auto-covariance at lag zero). The autocovariance curve/diffusion calculation was repeated at 500-sample-point intervals for the duration of the MD simulation, thus providing ~40 largely independent estimates of the diffusion coefficient for each position-restrained MD simulation. These estimates were averaged to produce the position-specific diffusion coefficient.

The effective membrane permeability,  $P_{\text{eff}}$ , can be calculated from the integral for effective resistivity,  $R_{\text{eff}}$ , (Marrink and Berendsen (63)),

$$\frac{1}{P_{\text{eff}}} = R_{\text{eff}} = \int_0^Z R(z) dz \quad (3)$$

where  $R(z)$  is the resistivity of each membrane slice,

$$R(z) = \frac{e^{\beta(\Delta G(z))}}{D(z)}, \quad (4)$$

where  $\beta$  is  $1/(k_B T)$ , that is, the inverse of the Boltzmann constant times the temperature,  $\Delta G(z)$  is the free energy from the PMF calculations, and the integral is over the bounds of the membrane.

In cases where a compound can exist in two protonation states at pH 7.4 (representation of physiological blood (64) and cytoplasmic (65) pH), the position-specific diffusion coefficient calculations are then carried out separately for each form—charged and neutral. In these cases the calculation of the resistivity of each membrane slice takes into account the potential flux of each form, accounting for the free-energy difference between the charged and neutral forms at each position,

$$R(z) = \frac{R_c(z)R_n(z)}{R_c(z) + R_n(z)}, \quad (5)$$

where  $R_c(z)$  and  $R_n(z)$ , are the resistivity of the charged and neutral forms, respectively.  $R_c(z)$  is calculated as in Eq. 3, with  $\Delta G_c(z)$ , the free energy of the charged form at position  $z$  compared to its free energy in bulk water, replacing  $\Delta G(z)$ .  $R_n(z)$  is calculated analogously, except that the neutral species PMFs used to calculate  $\Delta G_n(z)$  have been offset by the free energy required to neutralize the charged species of that compound in bulk water at pH 7.4, according to the method described by MacCallum, Bennett, and Tieleman (41),

$$\Delta G_{\text{neutralize}} = (\text{pK}_a - \text{pH})RT \ln 10, \quad (6)$$

where the  $\text{pK}_a$  for a compound is obtained from the literature,  $R$  is the gas constant,  $T$  is the temperature, and the  $\text{pH}$  is the physiological value of 7.4.

## RESULTS

### In silico system is consistent with existing published data

Membranes can have complicated phase behavior and care must be taken to simulate the desired phase. To ensure that the DOPC bilayer has the correct fluidity, the partial density profile of the system (Fig. 2 A) was measured to ensure the correct conformation of the bilayer and was compared to previous simulations (41,66–68). The density profile agrees extremely well with the published data, indicating that the system is equilibrated and behaving as anticipated. The membrane thickness (just >4 nm) lies within the limits defined by those previous simulations. The area per lipid is slightly (0.02–0.03 nm<sup>2</sup>) smaller than previous studies. However, this value is self-consistent (standard deviation of 0.01–0.02 nm<sup>2</sup>), and is only just outside the experimental range of uncertainty (0.01 nm<sup>2</sup>). The membrane-solvent interface is at ~2.5–3.0 nm from the center of the bilayer. Additionally, there is the characteristic dip in the density at the center of the bilayer due to the disorder of the lipid tails.

A second validation measure was to carry out a free-energy control simulation on a highly studied molecule

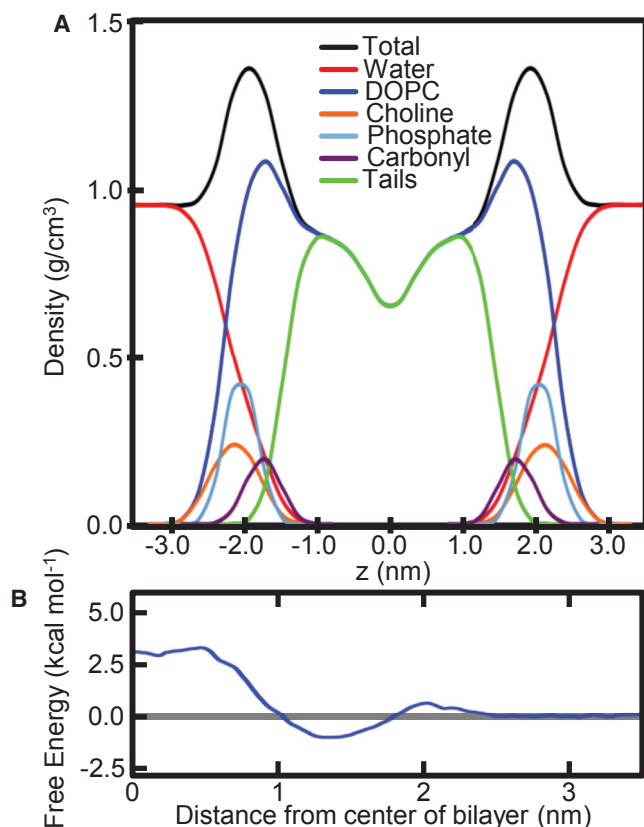

FIGURE 2 (A) Transverse partial density profile of the various components of the DOPC lipids forming the membrane. (B) PMF free energy for ethanol traversing through the DOPC membrane.

(ethanol) to ensure the generated parameters for the drug molecules are compatible with the GROMACS force field. For this simple test, we calculated the PMF profile for ethanol (Fig. 2 B), permeating the DOPC membrane. This small, uncomplicated molecule was previously studied by MacCallum, et al. (41,67), using the same lipid and water models, as the side-chain analog to threonine. The shape of our ethanol PMF curve is almost identical to that calculated by MacCallum, et al. A small maxima occurs at ~2.0 nm from the bilayer center (hydrophilic portion of the bilayer). There is a single minima at ~1.3 nm from the bilayer center due to the amphipathic nature of this region. A maximum plateau occurs at ~0.5 nm from the hydrophobic bilayer center. Indeed, our calculated free energy at the bilayer center (2.9 kcal/mol) is very similar to the reported 3.1 kcal/mol (41), and our calculated free energy at the interface (–0.9 kcal/mol) is also very close to the previously reported value of –1.0 kcal/mol (67). In the study by MacCallum et al., parameters for ethanol were derived from the OPLS force field, which has been shown to be well suited for free-energy calculations. The ethanol parameters generated from the ATB server perform as well as OPLS and should also provide reliable simulation results for the sample set of small molecule compounds.

Despite this excellent agreement with published data, our ethanol simulation was only carried out as a comparative control measure and will not be used for the BBB permeability analysis because ethanol is a notoriously difficult compound to measure (Liu, et al. (29) report an eightfold error in predicting ethanol logPS). Ethanol does not behave in the same way as other small drugs (29), and furthermore may itself alter the integrity of the BBB (69).

### Free-energy calculations for compounds crossing the bilayer

PMF profiles for the 12 compounds were calculated (Fig. 3 B). In general, the PMFs for most of these compounds show qualitatively similar overall behavior, but differ quantitatively within the membrane. All the compounds show an initial stabilizing interaction (the range of which varies from ~0.5–3.0 kcal/mol) when first going from bulk solvent into the headgroup region of the membrane (~2.5–3.0 nm from the bilayer center). Generally, the most stabilizing region of the membrane is 1.0–1.5 nm from the center of the membrane (with the exceptions of mannitol and salicylate, which are most stabilized at ~2.0–2.5 nm). This typical stabilization at ~1.0–1.5 nm from the center of the membrane reflects the amphipathic nature of these compounds because they must be soluble enough to travel in blood yet be hydrophobic enough to penetrate cellular membranes. A relative barrier (compared to the minima) for every compound is at the membrane center.

A general observation can be made about the PMF curves in terms of how they relate to the BBB permeability of the

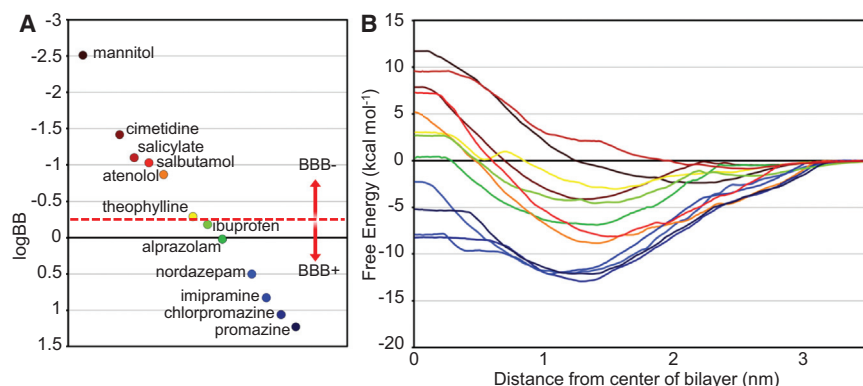

FIGURE 3 (A) The range of logBBs of the molecules studied. The horizontal axis distances have been introduced only for the purposes of clarity. (B) The PMFs for the molecules studied. For compounds that exist primarily as charged species at physiological pH, PMFs for both the charged and neutral state were calculated (Fig. S2). Their combined PMFs are presented here. BBB+ compounds are colored dark blue to green, whereas BBB- compounds are colored dark red to yellow.

compounds. The PMFs of BBB+ compounds are typically more negative relative to the free energy in bulk solvent, with the free energy at  $z = 0$  also negative (or just slightly above zero). In contrast, the PMFs of BBB- compounds are more positive, with the free energy at  $z = 0$  always positive relative to the free energy in bulk solvent.

The position-dependent diffusion coefficients for these compounds do not vary significantly from one another (Fig. 4). The average diffusion within the region of the bilayer ( $z < 3.0$  nm) for the compounds range from  $\sim 0.7 \times 10^{-6}$  cm<sup>2</sup>/s to  $\sim 1.4 \times 10^{-6}$  cm<sup>2</sup>/s. Throughout the bilayer, the values for each compound reach their minimum plateau at  $z \approx 2.5$ – $3.0$ , tending to be slightly higher at the disordered center. All the compounds show an order of magnitude increase in diffusion in bulk solvent relative to their calculated values within the bilayer. This is consistent with previous constrained MD simulations for small molecule compounds and drugs passing through a lipid bilayer. Our calculated diffusion coefficient for theophylline in bulk solvent (measured when  $z > 4.0$  nm) is  $1.4 \times 10^{-5}$  cm<sup>2</sup>/s. This is approximately a factor of two higher than published data

(83,84), but is consistent with the calculated self-diffusion of the SPC model of water that is also a factor of two higher than experimental values (85). However, these isolated membrane diffusion coefficients have no correlation with the experimental permeability values (Fig. 4, inset). Thus, in agreement with published data (38,86), the energy landscape of the compound appears to be the largest contribution to its permeability.

#### Computed $P_{\text{eff}}$ values have high correlation with experimental permeation measurements

Our goal is to assess the ability of our simple BBB mimetic system to reproduce the experimentally determined BBB permeability of these compounds. This assessment is first carried out in a qualitative fashion, to determine if we could correctly identify a compound as either BBB+ (crosses the BBB) or BBB- (does not cross the BBB). Subsequently, we subject our results to a more quantitative comparison, to establish how our relative permeability measurements correlated with experimental data.

Classification schemes reported in the literature use slightly different logBB cutoffs to classify compounds as either BBB+ or BBB-. These values range from  $-1.00$  (87) to  $+0.63$  (9). However, a large number of these classification schemes report the cutoff criteria to be a logBB value of 0.00, with compounds that have a logBB  $\geq 0.00$  being BBB+ (43,88–90). Notably, a logBB of zero implies an equal concentration on both sides of the BBB. Ibuprofen is a well-documented example that violates the cut-off rule, albeit by a small amount. Although ibuprofen is a BBB+ compound (45), it actually has a logBB of  $-0.18$  (75), slightly below the cutoff. The equivalent cutoff value for logPS (though not as robustly studied) is about  $-2.00$ , with compounds that have a logPS  $\geq -2.00$  being BBB+ (91). The range of log $P_{\text{eff}}$  values calculated for our sample set of 12 compounds is from  $\sim 2.8$  to  $-6.6$ , a range of nearly 10 log units (Table 1).

The log $P_{\text{eff}}$  data is plotted against the corresponding logBB and logPS values, and the linear regression line for data is calculated (Fig. 5). The linear regression plots

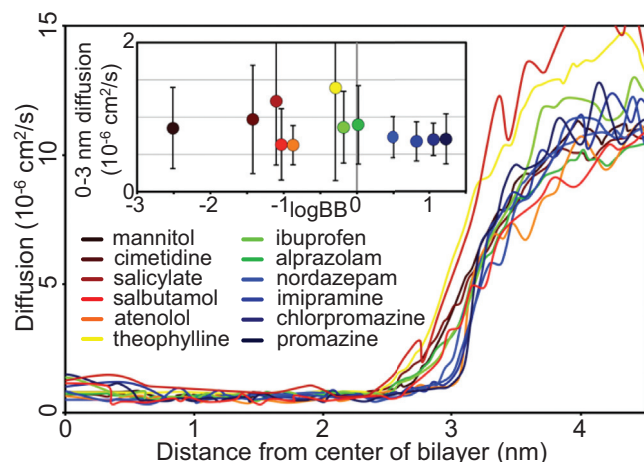

FIGURE 4 The calculated diffusion profiles for the compounds from bulk water through to the bilayer center. The average diffusion values (for  $z < 3.0$  nm) of the compounds are not significantly different and show no correlation with the logBB for that compound (inset).

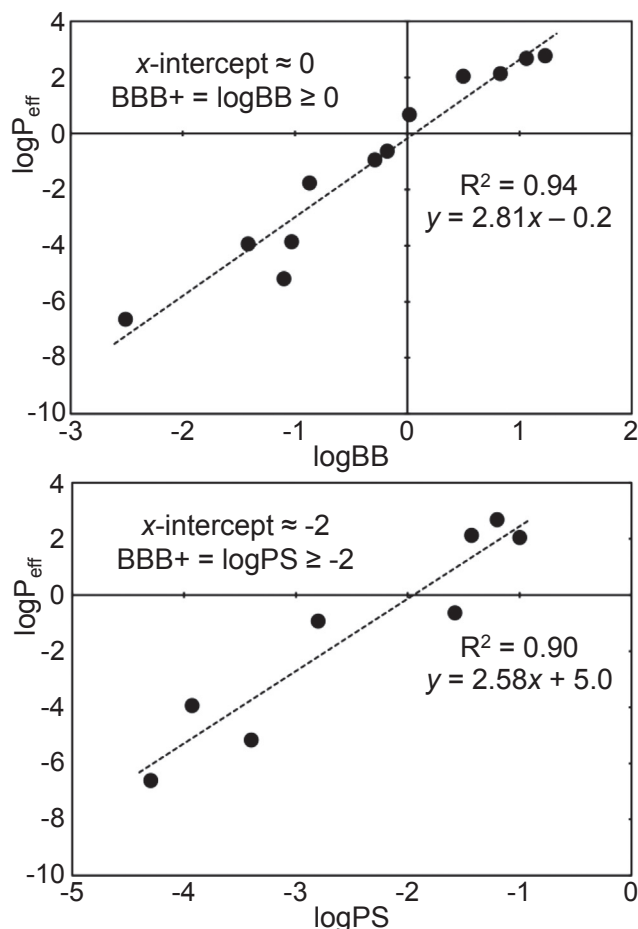

FIGURE 5 The  $\log P_{\text{eff}}$  values for the 12 compounds plotted against their corresponding  $\log BB$  values, and their  $\log PS$  values (where available). The correlation against both the  $\log BB$  and  $\log PS$  values is very high ( $R^2 = 0.94$  and  $0.90$ , respectively).

show that when the  $\log BB$  or  $\log PS$  values are at their respective cut-off thresholds (0.00 and  $-2.00$ ), the corresponding  $\log P_{\text{eff}}$  value is then  $\sim 0.00$ . This is true for both the  $\log BB$  and the  $\log PS$  plots. Thus,  $\log P_{\text{eff}} = 0.00$  is chosen as the cut-off for determining  $BBB+/-$  in our model. Using this value of  $\log P_{\text{eff}} = 0.00$  as the  $BBB+/-$  cutoff, our analysis and calculations correctly classifies 11 of the 12 compounds into the appropriate  $BBB+/-$  category (Table 1). The only compound incorrectly classified was ibuprofen. Even this incorrect classification was somewhat encouraging, as ibuprofen falls into the blurred region at the interface of  $BBB+/-$  classification. Indeed, it was very close ( $\sim 0.6$ ) to the cutoff value.

As a further qualitative assessment metric, the relative order of the compounds (in terms of their permeability) is also assessed. Of the 12 compounds, 10 are in the correct relative order when comparing our calculated  $\log P_{\text{eff}}$  values to the experimentally measured  $\log BB$  values. The only two compounds that are ranked incorrectly are cimetidine and salicylate. The order of these two compounds is

switched, with the  $\log P_{\text{eff}}$  of the two being about one log unit apart.

From a quantitative point of view, the  $\log P_{\text{eff}}$  values correlate extremely well with the experimentally measured parameters. Comparison of the  $\log P_{\text{eff}}$  values for the full sample set of 12 compounds against their experimental  $\log BB$  values gives an excellent correlation coefficient of  $R^2 = 0.94$ . Comparison against the available experimental  $\log PS$  values also gives an excellent correlation coefficient of  $R^2 = 0.90$ , although only over the subset of eight data points for which  $\log PS$  data are available.

Thus, by adapting the equation for the linear regression line between  $\log P_{\text{eff}}$  and  $\log BB$  (Fig. 5), we propose an equation to predict the  $\log BB$  of a compound from its calculated  $\log P_{\text{eff}}$ ,

$$\log BB = \frac{\log P_{\text{eff}} - 0.1725}{2.808}, \quad (7)$$

The resulting predicted  $\log BB$  values (Table 1) are, on average,  $<0.2$  log units from their experimental values. This methodology therefore enables a quantitative, accurate predictive technique using MD simulation for compounds for which experimental  $\log BB$  measurements have not yet been performed.

## DISCUSSION

### Predictive capability

We have demonstrated that our first proof-of-principle in silico protocol has the potential to accurately predict the passive permeability of 12 small compounds. Our  $\log P_{\text{eff}}$  predictions are correlated with  $\log BB$  and  $\log PS$  with  $R^2$  values of 0.94 and 0.90, respectively, and are comparable to the commonly used in silico and in vitro prediction methods.

Frequently, the  $\log P$  (the octanol/water partitioning coefficient—a measure of lipophilicity) of a compound can be used as a quick and simple prediction of its permeability and can be either measured or calculated. Regularly,  $\log P$  is one of the best single descriptors in QSAR models. For a quick comparison of predictive capabilities, the  $\log P$  of our 12 small molecules were calculated using a popular on-line  $\log P$  prediction server ([www.molinspiration.com](http://www.molinspiration.com)). These calculated  $\log P$  values correlate extremely well with the experimental  $\log P$  values (0.95), and have an  $R^2$  correlation of 0.81 against  $\log BB$ , and 0.76 against  $\log PS$ . However, when using the actual experimental  $\log P$  values, the  $R^2$  correlations for these experimental  $\log P$  values against experimental  $\log BB$  and  $\log PS$  values are only 0.77 and 0.70. Thus, our methodology offers a marked improvement over this oft-used approximation, as there appears to be certain crucial parameters missing from the  $\log P$  value that are needed to more accurately predict permeability. The in silico prediction of  $\log P$  values is extremely

accurate, but even if the logP prediction was 100% accurate, the single logP descriptor is not enough to predict BBB permeability with any correlation better than  $\sim 0.75$ .

Thus, using a single logP descriptor may simply not be enough to predict BBB permeability. To include more descriptors, QSAR models are most frequently used. The equivalent first proof-of-principle *in silico* protocol for using a QSAR model to predict logBB was constructed in 1988. It consisted of 20 training compounds and had a correlation of  $R^2 = 0.69$  (92). Since that time, the predictive capabilities of QSAR models have greatly improved. Correlation values of 0.72–0.86 (30–33) against logBB are the typical range of recent QSAR models. Predicting logPS using QSAR models generally correlates slightly better, with typical values of 0.74–0.95 (29,93–95). Recent comparative QSAR studies (33,97) on a test set of 24 compounds produced predicted logBB values that were both an average of 0.46 log units from the experimental values, more than double the 0.20 differential calculated for our 12 compounds. Indeed, even their top 12 closest matching predictions still had an average difference of 0.22 and 0.26 log units. Despite the success of QSAR models, they inherently depend on an adequate training set. In other words, data for similar compounds or compounds that occupy similar regions of the descriptor space are needed to train the initial model. Furthermore, the QSAR modeling approach requires a high quality data set of biological endpoints. Thus, QSAR prediction models depend greatly on the availability of experimental outcomes, and can only be considered accurate when the compound of interest has a common pharmacophore with the compounds in the training set (96). These biological endpoints and experimental outcomes may not be available for a novel compound of interest, especially when screening new lead compounds in drug discovery. The approach we present here is not limited by training sets or available experimental outcomes. Our approach simply needs the chemical structure of the compound to yield predictive results, allowing for any novel compound to be simulated during the drug discovery process, a clear advantage.

Although the protocol presented here is an *in silico* methodology, this *in silico* approach appears to yield better correlations than some common *in vitro* assays. Recently, permeabilities determined in PAMPA assays were compared against *in vivo* logBB values with correlations in the 0.65–0.75 range (19,22). In addition,  $R^2$  correlations for IAM results against logBB have also reached as high as 0.75 (98). These methods are resource intensive and slower throughput than most *in silico* methods. Our approach has the advantage of higher throughput than the traditional *in vitro* methods, while maintaining comparable (if not better) predictive capabilities.

Due to the highly expensive, time-consuming methods needed to gather accurate *in vivo* BBB permeability data for new compounds, the method presented here is a reason-

able predictive tool to be used in drug design process because it is faster and cheaper and, most importantly, predictive of permeability. Inserting a new tool into the early phase of the drug design process allows better decisions to be made, regarding which candidate compounds merit further investigation and could avoid unwanted side effects in future clinical trials.

### Robustness of method

Our *in silico* approach appears to be robust with respect to possible errors in calculating the PMF near the lipid bilayer center—a phenomena recently suggested by Neale, et al. that can often arise due to inadequate umbrella sampling in this region (99). This inadequate sampling, or hidden sampling barrier, at the center of the bilayer is caused by rare conformational transitions between lipid defects, and can lead to autocorrelation times on the order of 10  $\mu$ s as the simulation windows get within 0.5 nm of the bilayer center (99).

Thus, the uncertainty of the free-energy value at this central bilayer section is higher, and using a single free-energy point at this region as a metric may contain inherent errors. This may be a potential problem for several recent systematic PMF studies that have made quantitative predictions by taking only a single  $\Delta G$  free-energy difference between two points on the PMF curve, such as  $\Delta G_{\text{water} \rightarrow \text{lipid tails}}$  (100), or between water and another point near the bilayer center (101).

Similar problems could have occurred in our system if we had adopted the same approach. For example, consider the PMF profiles of two compounds we investigated, theophylline (BBB–) and nordazepam (BBB+) (Fig. 3 B, Fig. 6). If we were to simply take the  $z = 0$  free-energy value as our criterion for determining BBB permeability, these two compounds, which have experimental permeabilities almost an entire log unit apart, would then be separated by only  $\sim 4$  kcal/mol. Furthermore, this value is taken from a region of high uncertainty, thus leaving little room for error. However, by implementing our methodology to calculate  $P_{\text{eff}}$  (and using it as our measurement criterion), these two compounds are separated by three log units (–0.94 and 2.04 for theophylline and nordazepam, respectively).

To further investigate the robustness of our methodology to this potential sampling problem, we generated two artificial PMF profiles. We took the profiles for theophylline (a BBB– compound with a positive free energy at  $z = 0$ ) and nordazepam (a BBB+ compound with a negative free energy at  $z = 0$ ) and manipulated the height of the energy barriers at  $z = 0$ . The energy barriers were altered by 1.0, 0.5, –0.5, and –1.0 kcal/mol, and these changes in the PMF profile were extended out to almost  $z = 0.5$  (Fig. 6).

The artificial PMFs simulate potential error in the region of the central bilayer. Using these newly generated energy landscapes, various revised log $P_{\text{eff}}$  values can be calculated.



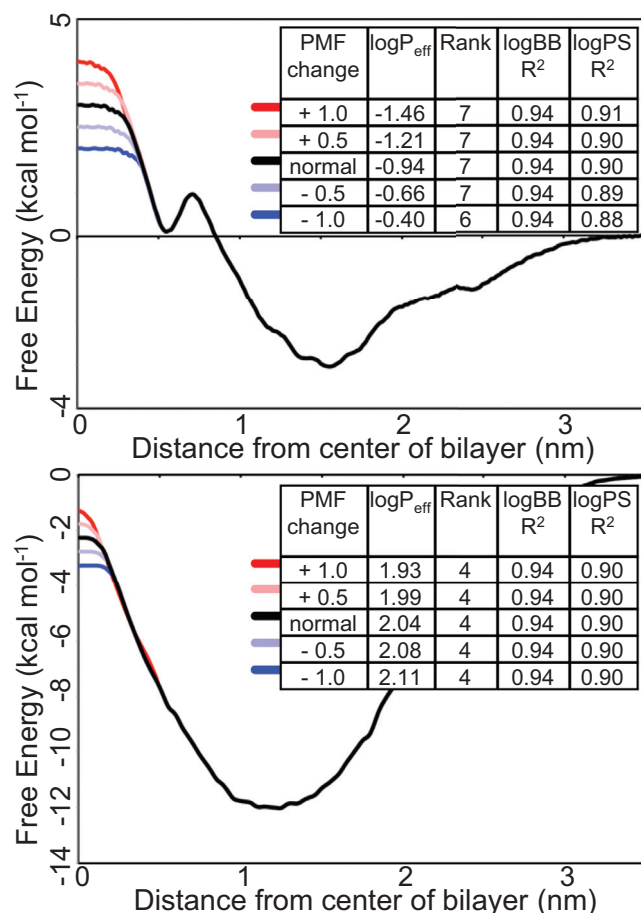

FIGURE 6 The artificially adjusted PMF profiles for theophylline (*top*) and nordazepam (*bottom*) and the resulting changes to the correlations with experimental data (*inset*).

After altering the  $z = 0$  energy barriers for each of the nordazepam and theophylline PMF curves, in only one extreme case does the rank order of the compounds (in terms of their  $P_{\text{eff}}$ ) change (and only by one position). The correlations with the experimental logBB results remain completely unaffected. At most the correlations with logPS are reduced by only 0.02. Even if we take the combination of the extreme values, whereby the nordazepam PMF was increased by 1 kcal/mol and the theophylline PMF was reduced by 1 kcal/mol, the  $R^2$  correlations with logBB and logPS are still 0.94 and 0.91, respectively. The advantage of our methodology is that it uses the entire PMF energy landscape. Thus, although the free-energy value at the bilayer center is still important, it does not carry the critical weight that it does for single-point measurements.

A further test of the robustness of the methodology is the selection of the cutoff value between what is classified as membrane and bulk solvent. Only within-membrane values of diffusion and PMF free energies are used to calculate the membrane  $P_{\text{eff}}$ . Given that the density of the DOPC lipid reaches zero at  $z = 3.0$  nm, and all the PMF curve values are zero (or very close to zero) at  $z = 3.0$  nm, this value

was the logical choice for the cutoff limit. However, the possibility remains that the chosen value may be too low or too high, and our model may be sensitive to an unsuitable cutoff. The use of an unsuitable cutoff value could result in inaccurate results due to either information being excluded (cutoff too low) or the inclusion of bulk-water artifacts (cutoff too high). To assess the effect of the cutoff value on our results, the  $P_{\text{eff}}$  for each compound was calculated using cutoffs of 2.5 and 3.5 nm, and the data again correlated against experiment. The 2.5 nm cutoff resulted in  $R^2$  correlations with logBB and logPS of 0.96 and 0.89, although equivalently the 3.5 nm cutoff correlations were 0.93 and 0.92. Thus, the methodology is insensitive to these variations in the membrane width cutoff value.

### Limitations

Despite the encouraging success of our system in predicting correlation against experimental values, the model has some limitations that should be noted. As with some simple in vitro methods (such as PAMPA and IAM), our system does not account for nonpassive compound movement of any sort. Thus, the model does not take into consideration the effect on any compounds that are subject to either P-gp-mediated efflux back across the BBB, or active uptake systems. For proof-of-principle testing and calibration, this limitation is less of an issue, as compounds can be selected based upon their purely passive permeability properties. However, for the ultimate goal of BBB permeability prediction of novel compounds this is a more important consideration. We foresee the future possibility of combining our in silico approach with additional in silico methods, such as docking the compounds to efflux/influx protein models, to determine a permeability profile that takes into account the active transportation routes.

Another possible limitation of our system is that for the sake of simplicity we have only included a single type of lipid in our membrane. The use of a mixed-lipid system would require a much longer equilibration time and thus an increased computational burden. Mixed-lipid simulations have a much shallower depth of literature, thus comparison and validation of our results would have proved more difficult.

Furthermore, other PAMPA models actually found better correlation when using a simple Black Lipid Membrane (a pure DOPC bilayer) instead of a bilayer representative of brain endothelial cells, although differences were minimal (19). Additionally, studies using a single type of lipid/detergent have achieved a  $R^2$  correlation of 0.75 and 0.79 using IAM and MLC (micellar liquid chromatography), respectively (98). Thus, our system agrees with several in vitro models that suggest a simple, single lipid membrane model can be sufficient to predict BBB permeability.

There are also a couple of computational difficulties to consider. We acknowledge that the quality of the force field

that is used to carry out the simulations and build high quality all-atom models for each molecule is a limitation. Different MD force fields have different strengths and weaknesses, and using one force field over another may result in slightly varied results (102). Using different methodologies to assign partial charges on compounds can also lead to varied results (68).

Finally, we must consider the computational cost of carrying out the free-energy calculations. Although each compound took an average of 150,000 cpu hours to generate a PMF and permeability value, the resulting values are extremely well correlated to experimental values ( $>0.90$ ). Calculating logP values is indeed computationally cheap (magnitudes less than PMF calculations). However, the logP values are inherently lacking sufficient information and at best give correlations to experiment of 0.75. Given the expense of late stage failures in drug development, the added computational cost of using PMFs to predict permeability may be well worth the price. Furthermore, with increases in computing power and parallelization, the actual time to complete these measurements will only continue to decrease.

## CONCLUSIONS

We have demonstrated success of our *in silico* BBB permeability prediction method using a small but diverse data set. This proof-of-principle study is similar in size to one of the earliest pioneering QSAR models to predict BBB permeability that was built in 1988 (training set of 20 compounds) (92). This early QSAR model only had an  $R^2$  correlation of 0.69 with experimental data. Our methodology is correct in qualitatively predicting 11 of 12 compounds to be either BBB+ or BBB-, and also establishing 10 of 12 in the exact order in terms of their experimentally measured permeability. Furthermore, we have quantitatively compared our results with the two major *in vivo* measures of BBB permeability: logBB and logPS. Our results have an  $R^2$  correlation of 0.94 and 0.90 with logBB and logPS, respectively—values that are comparable to or better than those of other prediction models. On average, our calculated logBB numbers were within 0.2 log units of their experimental values—again, comparable to or better than other prediction models. Thus, we have established the potential of this methodology to be expanded and developed in the future. Perhaps ultimately an *in silico* method similar to ours may be used in drug discovery as an accurate, relatively fast BBB permeability prediction tool, which does not rely upon (nor is biased by) existing data.

## SUPPORTING MATERIAL

Two figures are available at [http://www.biophysj.org/biophysj/supplemental/S0006-3495\(14\)00664-X](http://www.biophysj.org/biophysj/supplemental/S0006-3495(14)00664-X).

We thank Livermore Institutional Grand Challenge for the computing time.

We thank Laboratory Directed Research and Development 12-SI-004 for funding. This work performed under the auspices of the U.S. Department of Energy by Lawrence Livermore National Laboratory under Contract DE-AC52-07NA27344. LLNL-JRNL-648046.

## REFERENCES

1. Seddon, A. M., D. Casey, ..., O. Ces. 2009. Drug interactions with lipid membranes. *Chem. Soc. Rev.* 38:2509–2519.
2. Wolak, D. J., and R. G. Thorne. 2013. Diffusion of macromolecules in the brain: implications for drug delivery. *Mol. Pharm.* 10:1492–1504.
3. Banks, W. A. 2009. Characteristics of compounds that cross the blood-brain barrier. *BMC Neurol.* 9 (Suppl 1):S3.
4. Ballabh, P., A. Braun, and M. Nedergaard. 2004. The blood-brain barrier: an overview: structure, regulation, and clinical implications. *Neurobiol. Dis.* 16:1–13.
5. Prado-Prado, F., M. Escobar-Cubiella, and X. Garcia-Mera. 2011. Review of bioinformatics and QSAR studies of beta-secretase inhibitors. *Curr. Bioinf.* 6:3–15.
6. Dobson, P. D., and D. B. Kell. 2008. Carrier-mediated cellular uptake of pharmaceutical drugs: an exception or the rule? *Nat. Rev. Drug Discov.* 7:205–220.
7. Pangalos, M. N., L. E. Schechter, and O. Hurko. 2007. Drug development for CNS disorders: strategies for balancing risk and reducing attrition. *Nat. Rev. Drug Discov.* 6:521–532.
8. Ajay, G. W., G. W. Bemis, and M. A. Murcko. 1999. Designing libraries with CNS activity. *J. Med. Chem.* 42:4942–4951.
9. Adenot, M., and R. Lahana. 2004. Blood-brain barrier permeation models: discriminating between potential CNS and non-CNS drugs including P-glycoprotein substrates. *J. Chem. Inf. Comput. Sci.* 44:239–248.
10. Zhao, Y. H., M. H. Abraham, ..., D. P. Reynolds. 2007. Predicting penetration across the blood-brain barrier from simple descriptors and fragmentation schemes. *J. Chem. Inf. Model.* 47:170–175.
11. Martin, I. 2004. Prediction of blood-brain barrier penetration: are we missing the point? *Drug Discov. Today.* 9:161–162.
12. Pardridge, W. M. 2004. Log(BB), PS products and *in silico* models of drug brain penetration. *Drug Discov. Today.* 9:392–393.
13. Takasato, Y., S. I. Rapoport, and Q. R. Smith. 1984. An *in situ* brain perfusion technique to study cerebrovascular transport in the rat. *Am. J. Physiol.* 247:H484–H493.
14. Renkin, E. M. 1952. Capillary permeability to lipid-soluble molecules. *Am. J. Physiol.* 168:538–545.
15. Crone, C. 1963. The permeability of capillaries in various organs as determined by use of the 'indicator diffusion' method. *Acta Physiol. Scand.* 58:292–305.
16. Kansy, M., F. Senner, and K. Gubernator. 1998. Physicochemical high throughput screening: parallel artificial membrane permeation assay in the description of passive absorption processes. *J. Med. Chem.* 41:1007–1010.
17. Di, L., E. H. Kerns, ..., G. T. Carter. 2003. High throughput artificial membrane permeability assay for blood-brain barrier. *Eur. J. Med. Chem.* 38:223–232.
18. Masungi, C., J. Mensch, ..., M. E. Brewster. 2008. Parallel artificial membrane permeability assay (PAMPA) combined with a 10-day multiscreen Caco-2 cell culture as a tool for assessing new drug candidates. *Pharmazie.* 63:194–199.
19. Mensch, J., A. Melis, ..., P. Augustijns. 2010. Evaluation of various PAMPA models to identify the most discriminating method for the prediction of BBB permeability. *Eur. J. Pharm. Biopharm.* 74:495–502.

20. Tsinman, O., K. Tsinman, ..., A. Avdeef. 2011. Physicochemical selectivity of the BBB microenvironment governing passive diffusion—matching with a porcine brain lipid extract artificial membrane permeability model. *Pharm. Res.* 28:337–363.
21. Campbell, S. D., K. J. Regina, and E. D. Kharasch. 2014. Significance of lipid composition in a blood-brain barrier-mimetic PAMPA assay. *J. Biomol. Screen.* 19:437–444.
22. Könczöl, A., J. Müller, ..., G. T. Balogh. 2013. Applicability of a blood-brain barrier specific artificial membrane permeability assay at the early stage of natural product-based CNS drug discovery. *J. Nat. Prod.* 76:655–663.
23. Yang, C. Y., S. J. Cai, ..., C. Pidgeon. 1997. Immobilized artificial membranes - screens for drug membrane interactions. *Adv. Drug Deliv. Rev.* 23:229–256.
24. Ong, S., H. Liu, and C. Pidgeon. 1996. Immobilized-artificial-membrane chromatography: measurements of membrane partition coefficient and predicting drug membrane permeability. *J. Chromatogr. A.* 728:113–128.
25. Taillardat-Ertschinger, A., A. Galland, ..., B. Testa. 2002. Immobilized artificial membrane liquid chromatography: proposed guidelines for technical optimization of retention measurements. *J. Chromatogr. A.* 953:39–53.
26. Verzele, D., F. Lynen, ..., P. Sandra. 2012. Development of the first sphingomyelin biomimetic stationary phase for immobilized artificial membrane (IAM) chromatography. *Chem. Commun. (Camb.)* 48:1162–1164.
27. Osterberg, T., M. Svensson, and P. Lundahl. 2001. Chromatographic retention of drug molecules on immobilized liposomes prepared from egg phospholipids and from chemically pure phospholipids. *Eur. J. Pharm. Sci.* 12:427–439.
28. Stenberg, P., U. Norinder, ..., P. Artursson. 2001. Experimental and computational screening models for the prediction of intestinal drug absorption. *J. Med. Chem.* 44:1927–1937.
29. Liu, X., M. Tu, ..., B. J. Smith. 2004. Development of a computational approach to predict blood-brain barrier permeability. *Drug Metab. Dispos.* 32:132–139.
30. Norinder, U., and M. Haeblerlein. 2002. Computational approaches to the prediction of the blood-brain distribution. *Adv. Drug Deliv. Rev.* 54:291–313.
31. Fan, Y., R. Unwalla, ..., C. Humblet. 2010. Insights for predicting blood-brain barrier penetration of CNS targeted molecules using QSPR approaches. *J. Chem. Inf. Model.* 50:1123–1133.
32. Katritzky, A. R., M. Kuanar, ..., A. Varnek. 2006. Correlation of blood-brain penetration using structural descriptors. *Bioorg. Med. Chem.* 14:4888–4917.
33. Wu, Z. Y., J. Pan, ..., A. Zhou. 2012. Comparison of prediction models for blood brain barrier permeability and analysis of the molecular descriptors. *Pharmazie.* 67:628–634.
34. Borhani, D. W., and D. E. Shaw. 2012. The future of molecular dynamics simulations in drug discovery. *J. Comput. Aided Mol. Des.* 26:15–26.
35. Deng, Y., and B. Roux. 2009. Computations of standard binding free energies with molecular dynamics simulations. *J. Phys. Chem. B.* 113:2234–2246.
36. Devaux, P. F. 1991. Static and dynamic lipid asymmetry in cell membranes. *Biochemistry.* 30:1163–1173.
37. Bemporad, D., J. W. Essex, and C. Luttmann. 2004. Permeation of small molecules through a lipid bilayer: a computer simulation study. *J. Phys. Chem. B.* 108:4875–4884.
38. Orsi, M., and J. W. Essex. 2010. Permeability of drugs and hormones through a lipid bilayer: insights from dual-resolution molecular dynamics. *Soft Matter.* 6:3797–3808.
39. Holland, B. W., C. G. Gray, and B. Tomberli. 2012. Calculating diffusion and permeability coefficients with the oscillating forward-reverse method. *Phys. Rev. E Stat. Nonlin. Soft Matter Phys.* 86:036707.
40. Boggara, M. B., and R. Krishnamoorti. 2010. Partitioning of nonsteroidal antiinflammatory drugs in lipid membranes: a molecular dynamics simulation study. *Biophys. J.* 98:586–595.
41. MacCallum, J. L., W. F. D. Bennett, and D. P. Tieleman. 2008. Distribution of amino acids in a lipid bilayer from computer simulations. *Biophys. J.* 94:3393–3404.
42. Marrink, S. J., and H. J. C. Berendsen. 1996. Permeation process of small molecules across lipid membranes studied by molecular dynamics simulations. *J. Phys. Chem.* 100:16729–16738.
43. Crivori, P., G. Cruciani, ..., B. Testa. 2000. Predicting blood-brain barrier permeation from three-dimensional molecular structure. *J. Med. Chem.* 43:2204–2216.
44. Pardridge, W. M. 1981. Transport of protein-bound hormones into tissues in vivo. *Endocr. Rev.* 2:103–123.
45. Ooms, F., P. Weber, ..., B. Testa. 2002. A simple model to predict blood-brain barrier permeation from 3D molecular fields. *Biochim. Biophys. Acta.* 1587:118–125.
46. Li, H., C. W. Yap, ..., Y. Z. Chen. 2005. Effect of selection of molecular descriptors on the prediction of blood-brain barrier penetrating and nonpenetrating agents by statistical learning methods. *J. Chem. Inf. Model.* 45:1376–1384.
47. Hess, B., C. Kutzner, ..., E. Lindahl. 2008. GROMACS 4: algorithms for highly efficient, load-balanced, and scalable molecular simulation. *J. Chem. Theory Comput.* 4:435–447.
48. Berger, O., O. Edholm, and F. Jähnig. 1997. Molecular dynamics simulations of a fluid bilayer of dipalmitoylphosphatidylcholine at full hydration, constant pressure, and constant temperature. *Biophys. J.* 72:2002–2013.
49. Oostenbrink, C., A. Villa, ..., W. F. van Gunsteren. 2004. A biomolecular force field based on the free enthalpy of hydration and solvation: the GROMOS force-field parameter sets 53A5 and 53A6. *J. Comput. Chem.* 25:1656–1676.
50. Berendsen, H. J. C., J. P. M. Postma, ..., J. Hermans. 1981. Interaction models for water in relation to protein hydration. In *Intermolecular Forces*. B. Pullman, editor. D. Reidel, Dordrecht, The Netherlands, pp. 331–342.
51. Hoover, W. G. 1985. Canonical dynamics: equilibrium phase-space distributions. *Phys. Rev. A.* 31:1695–1697.
52. Parrinello, M., and A. Rahman. 1981. Polymorphic transitions in single-crystals - a new molecular-dynamics method. *J. Appl. Phys.* 52:7182–7190.
53. Hess, B., H. Bekker, ..., J. G. E. M. Fraaije. 1997. LINCS: a linear constraint solver for molecular simulations. *J. Comput. Chem.* 18:1463–1472.
54. Darden, T., D. York, and L. Pedersen. 1993. Particle mesh Ewald - an N.log(N) method for Ewald sums in large systems. *J. Chem. Phys.* 98:10089–10092.
55. Essmann, U., L. Perera, and M. Berkowitz. 1995. A smooth particle mesh Ewald Method. *J. Chem. Phys.* 103:8577–8593.
56. Malde, A. K., L. Zuo, ..., A. E. Mark. 2011. An automated force field topology builder (ATB) and repository: version 1.0. *J. Chem. Theory Comput.* 7:4026–4037.
57. Becke, A. D. 1993. Density-functional thermochemistry. 3. The role of exact exchange. *J. Chem. Phys.* 98:5648–5652.
58. Lee, C., W. Yang, and R. G. Parr. 1988. Development of the Colle-Salvetti correlation-energy formula into a functional of the electron density. *Phys. Rev. B Condens. Matter.* 37:785–789.
59. Perdew, J. P., and Y. Wang. 1992. Accurate and simple analytic representation of the electron-gas correlation energy. *Phys. Rev. B Condens. Matter.* 45:13244–13249.
60. Singh, U. C., and P. A. Kollman. 1984. An approach to computing electrostatic charges for molecules. *J. Comput. Chem.* 5:129–145.
61. Kumar, S., J. M. Rosenberg, ..., P. A. Kollman. 1992. The weighted histogram analysis method for free-energy calculations on biomolecules. 1. The method. *J. Comput. Chem.* 13:1011–1021.

62. Hummer, G. 2005. Position-dependent diffusion coefficients and free energies from Bayesian analysis of equilibrium and replica molecular dynamics simulations. *New J. Phys.* 7:34.
63. Marrink, S. J., and H. J. C. Berendsen. 1994. Simulation of water transport through a lipid membrane. *J. Phys. Chem.* 98:4155–4168.
64. Rosenthal, T. B. 1948. The effect of temperature on the pH of blood and plasma in vitro. *J. Biol. Chem.* 173:25–30.
65. Roos, A., and W. F. Boron. 1981. Intracellular pH. *Physiol. Rev.* 61:296–434.
66. Palonciová, M., K. Berka, and M. Otyepka. 2013. Molecular insight into affinities of drugs and their metabolites to lipid bilayers. *J. Phys. Chem. B.* 117:2403–2410.
67. MacCallum, J. L., W. F. Bennett, and D. P. Tieleman. 2007. Partitioning of amino acid side chains into lipid bilayers: results from computer simulations and comparison to experiment. *J. Gen. Physiol.* 129:371–377.
68. Palonciová, M., K. Berka, and M. Otyepka. 2012. Convergence of free energy profile of coumarin in lipid bilayer. *J. Chem. Theory Comput.* 8:1200–1211.
69. Haorah, J., D. Heilman, ..., Y. Persidsky. 2005. Ethanol-induced activation of myosin light chain kinase leads to dysfunction of tight junctions and blood-brain barrier compromise. *Alcohol. Clin. Exp. Res.* 29:999–1009.
70. Raub, T. J., .... 2006. Early preclinical evaluation of brain exposure in support of hit identification and lead optimization. in *Optimizing the Drug-Like Properties of Leads in Drug Discovery*. [http://link.springer.com/chapter/10.1007/978-0-387-44961-6\\_16](http://link.springer.com/chapter/10.1007/978-0-387-44961-6_16).
71. Murakami, H., H. Takanaga, ..., Y. Sawada. 2000. Comparison of blood-brain barrier permeability in mice and rats using in situ brain perfusion technique. *Am. J. Physiol. Heart Circ. Physiol.* 279:H1022–H1028.
72. Zhao, R., J. C. Kalvass, and G. M. Pollack. 2009. Assessment of blood-brain barrier permeability using the in situ mouse brain perfusion technique. *Pharm. Res.* 26:1657–1664.
73. Zhang, L., H. Zhu, ..., A. Tropsha. 2008. QSAR modeling of the blood-brain barrier permeability for diverse organic compounds. *Pharm. Res.* 25:1902–1914.
74. Shayanfar, A., S. Soltani, and A. Jouyban. 2011. Prediction of blood-brain distribution: effect of ionization. *Biol. Pharm. Bull.* 34:266–271.
75. Garg, P., and J. Verma. 2006. In silico prediction of blood brain barrier permeability: an Artificial Neural Network model. *J. Chem. Inf. Model.* 46:289–297.
76. Parepally, J. M. R., H. Mandula, and Q. R. Smith. 2006. Brain uptake of nonsteroidal anti-inflammatory drugs: ibuprofen, flurbiprofen, and indomethacin. *Pharm. Res.* 23:873–881.
77. Karelson, M., D. Dobchev, ..., G. Karelson. 2008. Correlation of blood-brain penetration and human serum albumin binding with theoretical descriptors. *ARKIVOC.* 16:38–60.
78. Jones, D. R., S. D. Hall, ..., G. R. Wilkinson. 1988. Brain uptake of benzodiazepines: effects of lipophilicity and plasma protein binding. *J. Pharmacol. Exp. Ther.* 245:816–822.
79. Shen, J., Y. Du, ..., Y. Tang. 2008. In silico prediction of blood-brain partitioning using a chemometric method called genetic algorithm based variable selection. *QSAR Comb. Sci.* 27:704–717.
80. Cisternino, S., H. Chapy, ..., J. M. Scherrmann. 2013. Coexistence of passive and proton antiporter-mediated processes in nicotine transport at the mouse blood-brain barrier. *AAPS J.* 15:299–307.
81. Summerfield, S. G., K. Read, ..., P. Jeffrey. 2007. Central nervous system drug disposition: the relationship between in situ brain permeability and brain free fraction. *J. Pharmacol. Exp. Ther.* 322:205–213.
82. Salminen, T., A. Pulli, and J. Taskinen. 1997. Relationship between immobilized artificial membrane chromatographic retention and the brain penetration of structurally diverse drugs. *J. Pharm. Biomed. Anal.* 15:469–477.
83. de Smidt, J. H., J. G. Fokkens, ..., D. J. Crommelin. 1986. Dissolution of theophylline monohydrate and anhydrous theophylline in buffer solutions. *J. Pharm. Sci.* 75:497–501.
84. Grassi, M., I. Colombo, and R. Lapasin. 2001. Experimental determination of the theophylline diffusion coefficient in swollen sodium-alginate membranes. *J. Control. Release.* 76:93–105.
85. Mark, P., and L. Nilsson. 2001. Structure and dynamics of the TIP3P, SPC, and SPC/E water models at 298 K. *J. Phys. Chem. A.* 105:9954–9960.
86. Orsi, M., W. E. Sanderson, and J. W. Essex. 2009. Permeability of small molecules through a lipid bilayer: a multiscale simulation study. *J. Phys. Chem. B.* 113:12019–12029.
87. Luco, J. M. 1999. Prediction of the brain-blood distribution of a large set of drugs from structurally derived descriptors using partial least-squares (PLS) modeling. *J. Chem. Inf. Comput. Sci.* 39:396–404.
88. Deconinck, E., M. H. Zhang, ..., Y. Vander Heyden. 2006. Classification tree models for the prediction of blood-brain barrier passage of drugs. *J. Chem. Inf. Model.* 46:1410–1419.
89. Rose, K., L. H. Hall, and L. B. Kier. 2002. Modeling blood-brain barrier partitioning using the electrotopological state. *J. Chem. Inf. Comput. Sci.* 42:651–666.
90. Cabrera, M. A., M. Bermejo, ..., R. Ramos. 2004. TOPS-MODE approach for the prediction of blood-brain barrier permeation. *J. Pharm. Sci.* 93:1701–1717.
91. Suenderhauf, C., F. Hammann, and J. Huwyler. 2012. Computational prediction of blood-brain barrier permeability using decision tree induction. *Molecules.* 17:10429–10445.
92. Young, R. C., R. C. Mitchell, ..., T. J. Wilks. 1988. Development of a new physicochemical model for brain penetration and its application to the design of centrally acting H2 receptor histamine antagonists. *J. Med. Chem.* 31:656–671.
93. Levin, V. A. 1980. Relationship of octanol/water partition coefficient and molecular weight to rat brain capillary permeability. *J. Med. Chem.* 23:682–684.
94. Gratton, J. A., M. H. Abraham, ..., H. S. Chadha. 1997. Molecular factors influencing drug transfer across the blood-brain barrier. *J. Pharm. Pharmacol.* 49:1211–1216.
95. Abraham, M. H. 2004. The factors that influence permeation across the blood-brain barrier. *Eur. J. Med. Chem.* 39:235–240.
96. Weaver, S., and M. P. Gleeson. 2008. The importance of the domain of applicability in QSAR modeling. *J. Mol. Graph. Model.* 26:1315–1326.
97. Fu, X. C., G. P. Wang, ..., J. Q. Gao. 2008. Predicting blood-brain barrier penetration from molecular weight and number of polar atoms. *Eur. J. Pharm. Biopharm.* 70:462–466.
98. De Vrieze, M., F. Lynen, ..., P. Sandra. 2013. Predicting drug penetration across the blood-brain barrier: comparison of micellar liquid chromatography and immobilized artificial membrane liquid chromatography. *Anal. Bioanal. Chem.* 405:6029–6041.
99. Neale, C., C. Madill, ..., R. Pomès. 2013. Accelerating convergence in molecular dynamics simulations of solutes in lipid membranes by conducting a random walk along the bilayer normal. *J. Chem. Theory Comput.* 9:3686–3703.
100. Wennberg, C. L., D. van der Spoel, and J. S. Hub. 2012. Large influence of cholesterol on solute partitioning into lipid membranes. *J. Am. Chem. Soc.* 134:5351–5361.
101. Meng, F., and W. Xu. 2013. Drug permeability prediction using PMF method. *J. Mol. Model.* 19:991–997.
102. Garrido, N. M., A. J. Queimada, ..., I. G. Economou. 2009. 1-Octanol/water partition coefficients of *n*-alkanes from molecular simulations of absolute solvation free energies. *J. Chem. Theory Comput.* 5:2436–2446.

**SUPPORTING MATERIAL:  
A METHOD TO PREDICT BLOOD-BRAIN BARRIER PERMEABILITY OF  
DRUG-LIKE COMPOUNDS USING MOLECULAR DYNAMICS SIMULATIONS**

Timothy S. Carpenter, Daniel A. Kirshner, Edmond Y. Lau, Sergio E. Wong, Jerome P. Nilmeier, and Felice C. Lightstone

Biosciences and Biotechnology Division, Physical and Life Sciences Directorate,  
Lawrence Livermore National Laboratory, Livermore, CA 94550.

Corresponding author: Felice C. Lightstone

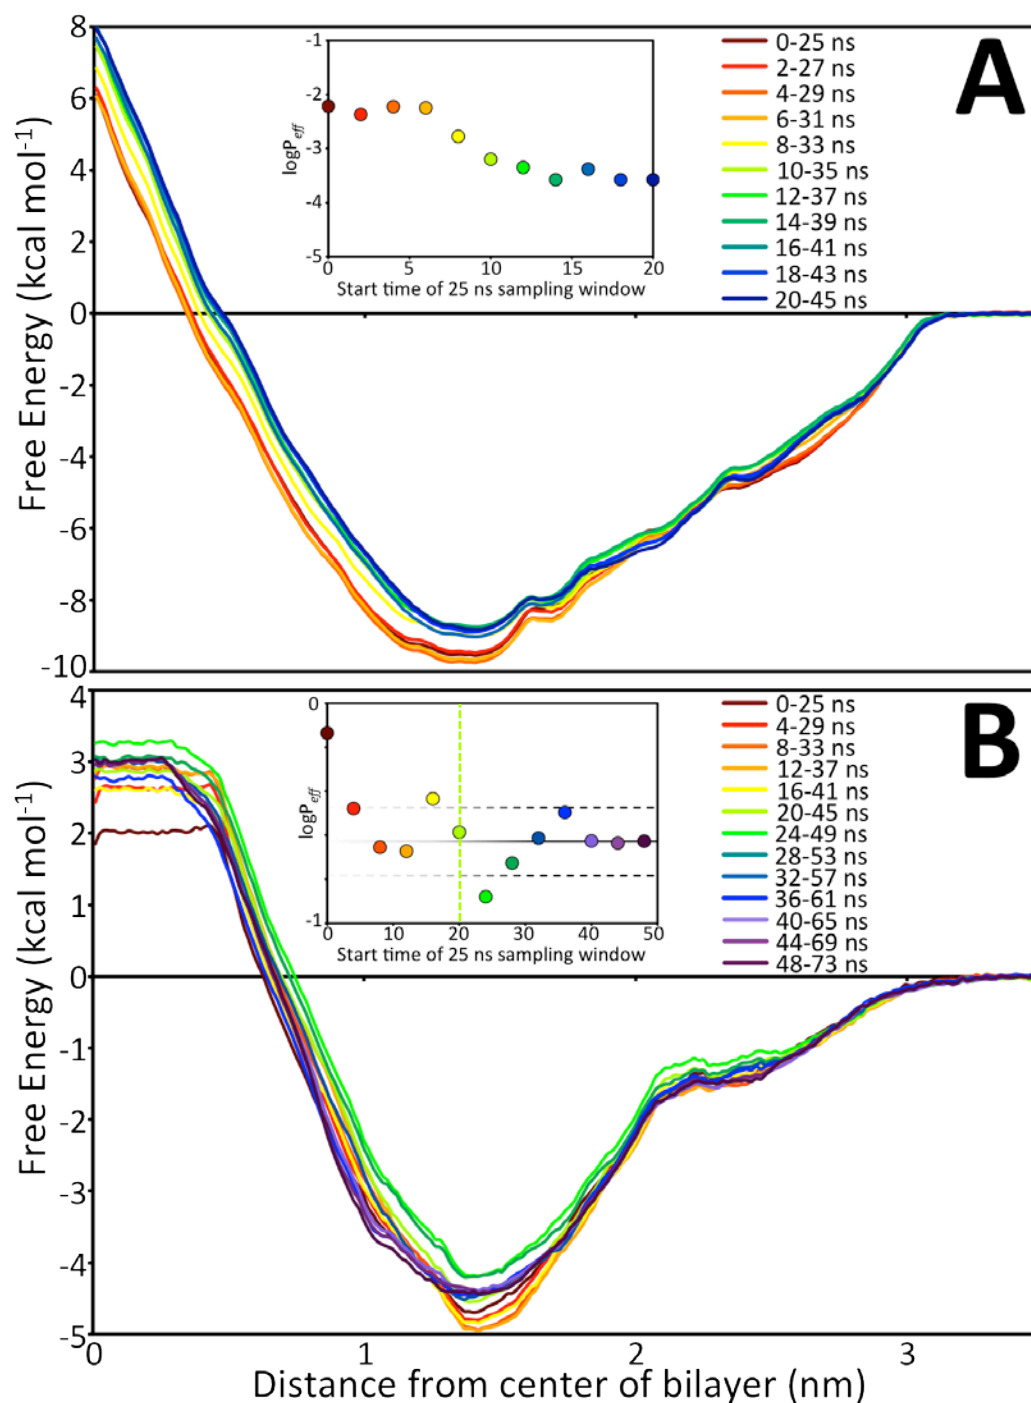

Figure S1. In order to check the equilibration and convergence of the umbrella sampling simulation windows, 25 ns ‘slices’ were taken through the trajectory and used to calculate the PMF and subsequent  $\log P_{eff}$  of the specific compound. These curves and values are colored according to time. Most PMF curves and  $\log P_{eff}$  values converged well within the 20 ns equilibration used as standard within our protocol, such as the charged species of atenolol (**A**). However, some species, such as the neutral form of salicylate (**B**), did not reach a converged value within the first 20 ns. In these cases, extended simulations (sometimes including an increased resolution in umbrella sampling windows) were needed. For salicylate, it appears to take ~30 ns to converge to values that fall within the same error range (black dashed lines – measured using bootstrapping error calculations).

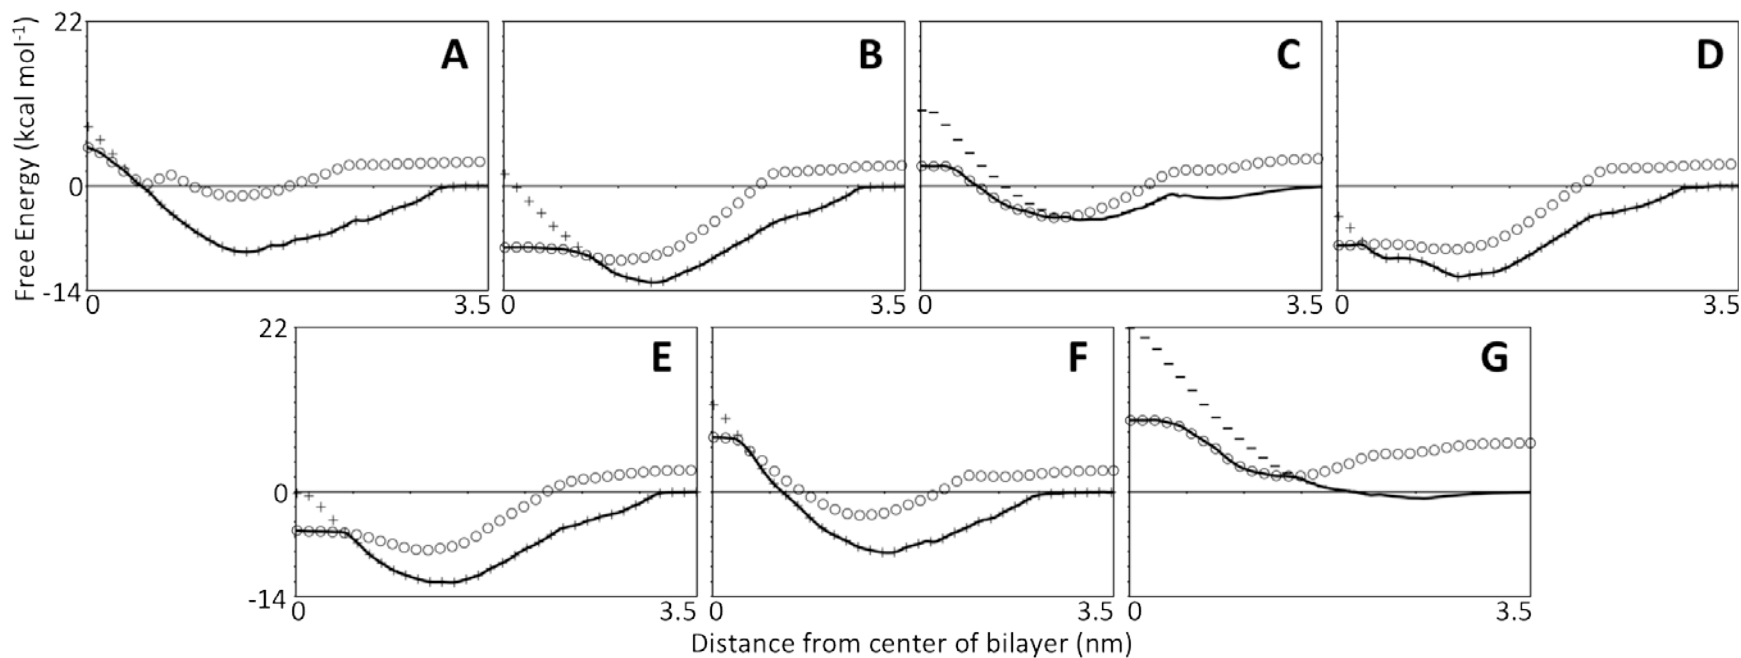

Figure S2. The individual PMFs for the neutral (indicated by ‘o’) and charged species (indicated by ‘+’ or ‘-’) of atenolol (**A**), chlorpromazine (**B**), ibuprofen (**C**), imipramine (**D**), promazine (**E**), salbutamol (**F**), and salicylate (**G**). The solid black line follows the lowest PMF value at each point. These compounds exist primarily in a charged state at physiological pH. As such, PMFs curves were calculated for both their charged and neutral species. The neutral PMFs have been offset by the free energy required to neutralize the compound in bulk water at pH 7.4, according to each compound’s experimentally measured pKa, and the methodology used by MacCallum *et al.* [1].

### References

1. MacCallum, J.L., W.F.D. Bennett, and D.P. Tieleman, *Distribution of amino acids in a lipid bilayer from computer simulations*. *Biophysical Journal*, 2008. **94**(9): p. 3393-3404.
